# Supplementary material
Source: PubMed Central journal article supplement (PMC3151066)

# Bäumer et al. Suppl. Fig. S1:

## GST-pulldown assays uncover a specific cyclin A1-binding site at amino acids 88-116 in the murine Inca1 protein.

(A) Homologous region of cyclin A1 binding in human and murine Inca1 proteins. Underlined = region deleted in the constructs shown in B and D. Grey = minimal overlap between cyclin A1 binding between human and murine sequence of Inca1-cDNA.

(B) (Upper panel) The homologous region between the human and the murine Inca1 protein that includes the human cyclin A1 binding site aa 75-99 was deleted in the murine sequence.

(Middle panel) Coomassie staining of the proteins expressed in E. coli from the constructs shown in (A) to determine the equal amounts of both proteins for the pulldown assays depicted in the lower panel. M = Marker, FL = full length INCA1, del 75-99 = deletion mutant of full length INCA1 lacking the aa 75-99.

(Lower panel) Upon incubation with CDK2 and cyclin A1, the INCA1 deletion mutant del75-99 showed strongly decreased binding affinity for cyclin A1.

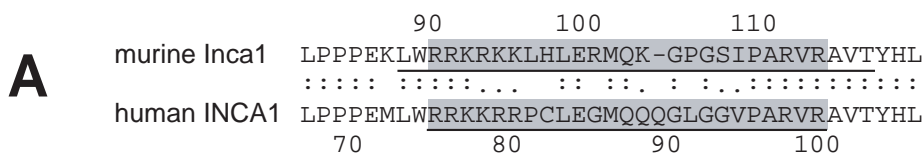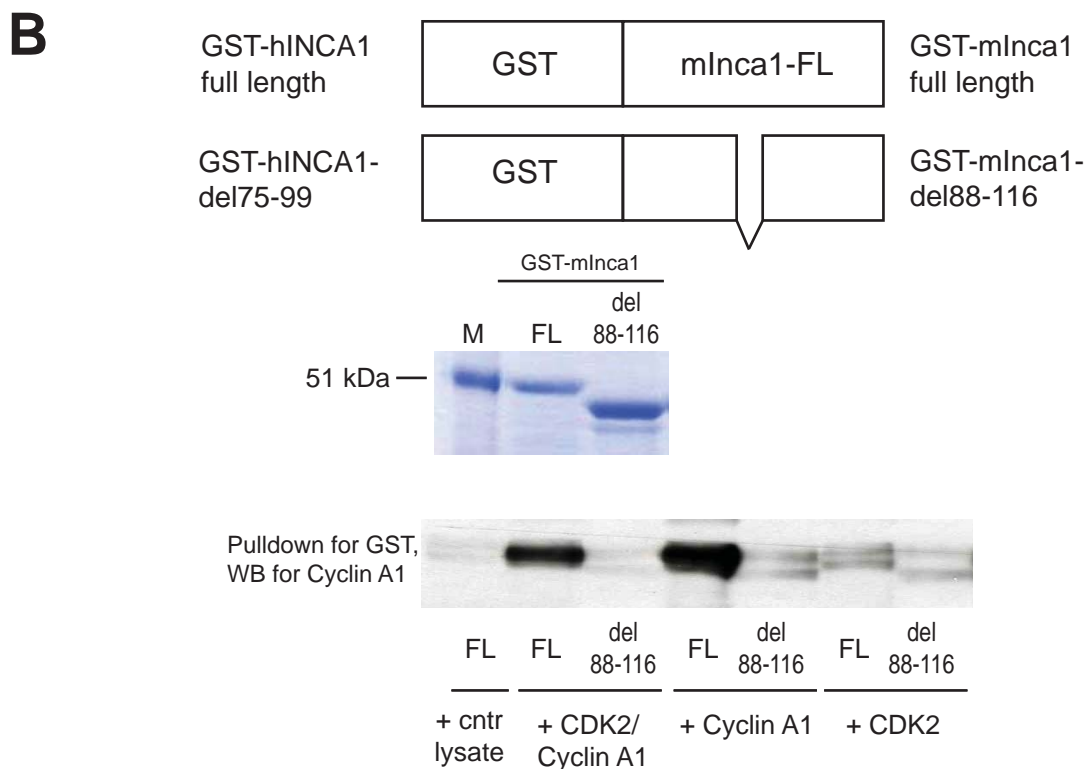

Supplement: supp_M110.203471_jbc.M110.203471-1.pdf [file supp_M110.203471_jbc.M110.203471-1.pdf]
