# Supplementary material
Source: PubMed Central journal article supplement (PMC3151066)

# Bäumer et al. Suppl. Fig. S2:

## Loss of *Inca1* correlates with increased S-phase

Cell cycle distribution of different primary wildtype (n=15) and *Inca1* knockout (n=7) MEF cell lines by propidium iodide staining. After 24 h of starvation in 0.5% FCS, the knockout cell lines had a significantly lower G1 and higher S-phase content than the wildtype cells (both  $p < 0.03$ , t-test). G2/M-phase was not altered. These effects were weaker or undetectable at higher serum concentrations.

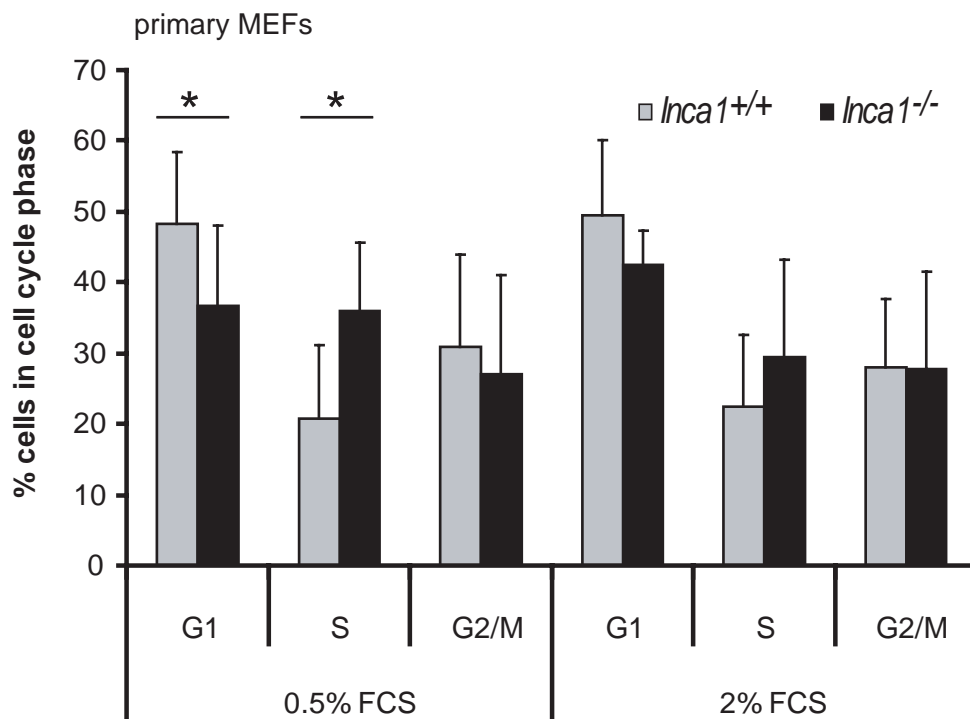

Supplement: supp_M110.203471_jbc.M110.203471-2.pdf [file supp_M110.203471_jbc.M110.203471-2.pdf]
