# Supplementary material
Source: PubMed Central journal article supplement (PMC3151066)

# Bäumer et al. Suppl. Fig. S3:

**Absence of *Inca1* has no impact on the composition of spleens or antibody concentrations in the plasma.**

(A) FACS analysis revealed an unchanged composition of *Inca1*<sup>-/-</sup> spleens compared to wildtype controls. (B) Determination of antibody concentrations in the plasma of *Inca1*<sup>+/+</sup> and *Inca1*<sup>-/-</sup> mice. The concentration of IgA was slightly increased in *Inca1*<sup>-/-</sup> samples (p=0.039).

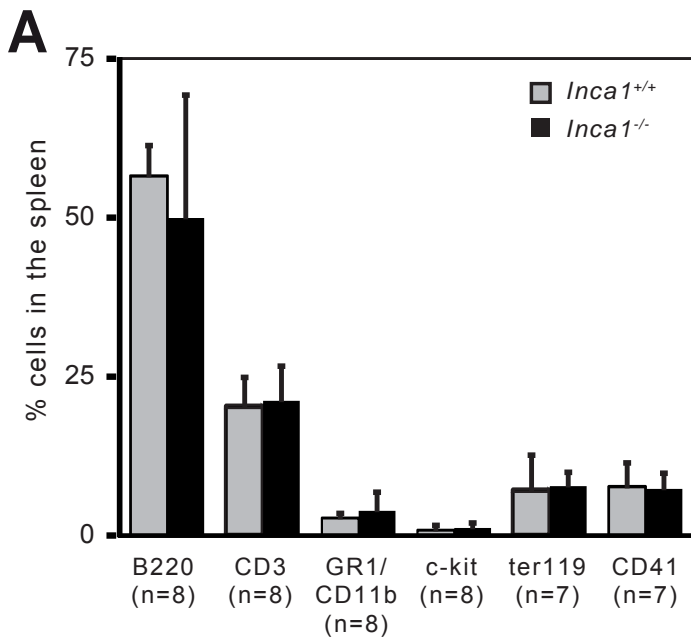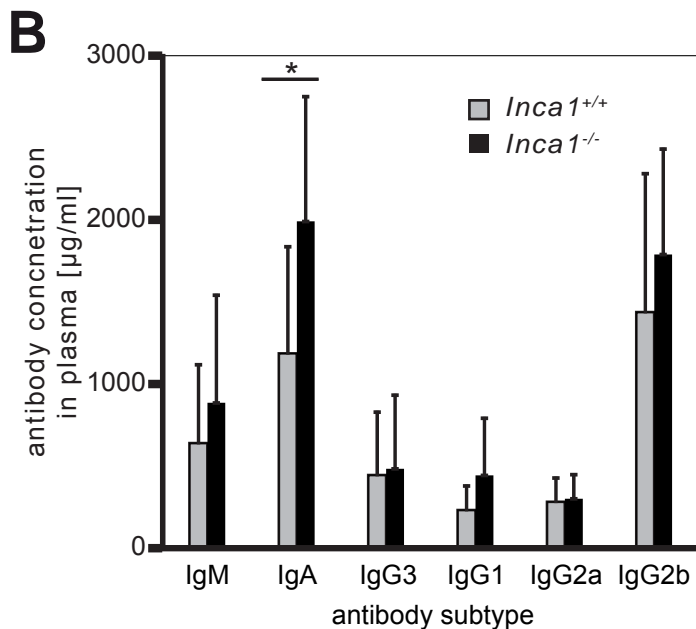

Supplement: supp_M110.203471_jbc.M110.203471-3.pdf [file supp_M110.203471_jbc.M110.203471-3.pdf]
